# Supplementary material for: Genomics of Re-emergent <em>Aeromonas salmonicida</em> in Atlantic Salmon Outbreaks
Source: Preprints.org preprint supplement (doi:10.20944/preprints202312.0029.v1), 2023-12-01
Supplement: Supplementary file 1 [file supplementary]

## Sheet: Sheet1
strain	min length	mean length	max length	duplication rate	total reads	total bases	GC content
CIBA_5017	107bp	8017bp	31467bp	2.365e-05	126.827000 K	1.016895 G	0.5328
ASA04	120bp	7632bp	112367bp	2.187e-05	26.084000 K	199.094008 M	0.5742
ASA05	131bp	5664bp	58001bp	0	22.627000 K	128.168155 M	0.5737
